# Supplementary material for: The rise of predation in Jurassic lampreys
Source: Springer Nature journal article supplement (doi:10.1038/s41467-023-42251-0), 2023-10-31
Supplement: 41467_2023_42251_MOESM3_ESM.pdf [file 41467_2023_42251_MOESM3_ESM.pdf]

## **Description of Additional Supplementary Files**

File Name: Supplementary Code 1

Description: Total evidence data matrix

File Name: Supplementary Code 2

Description: Total-evidence analyses command and log file

File Name: Supplementary Code 3

Description: All-compatible tree file

File Name: Supplementary Code 4

Description: Ancestral state reconstruction

File Name: Supplementary Code 5

Description: Reconstruction of ancestral states of feeding mechanism (1)

File Name: Supplementary Code 6

Description: Reconstruction of ancestral states of feeding mechanism-2

File Name: Supplementary Code 7

Description: Reconstruction of ancestral areas of some key nodes (distribution partitions)

File Name: Supplementary Code 8

Description: Reconstruction of ancestral areas of some key nodes (run)
